# Supplementary material for: Model based process optimization for nanoparticle precipitation
Source: Royal Society of Chemistry journal article supplement (doi:10.1039/d5re00333d), 2025-12-23
Supplement: d5re00333d1.pdf [file d5re00333d1.pdf]

## Supporting Information

### Model based process optimization for nanoparticle precipitation

Andrea Gilch,<sup>\*,a</sup> Adeel Muneer,<sup>\*,b</sup> Jana Dienstbier,<sup>a</sup> and Lukas Pflug<sup>b</sup>

#### Fixed point mapping

##### S1 Compact form

The fixed point equation for  $k \in \{2, \dots, N_t\}$  is given by:

$$F_k(\bar{C}, C) = C_k - C_{k-1} - (\bar{C}_k - \bar{C}_{k-1}) + \frac{\pi\rho}{6M_P} \mathcal{N}(C_{k-1}) \delta_{k-1} \mathbf{G}_{k-1,k-1}^3 + \frac{\pi\rho}{6M_P} \sum_{\ell=1}^{k-2} \mathcal{N}(C_\ell) \delta_\ell (\mathbf{G}_{\ell,k-1}^3 - \mathbf{G}_{\ell,k-2}^3) \quad (\text{S1})$$

and, for  $k = 1$ ,

$$F_1(\bar{C}, C) = C_1 - M_1. \quad (\text{S2})$$

##### S2 Derivative of the fixed point mapping

The derivative of the fixed point mapping  $F$  w.r.t concentration  $C$  reads as follows:

$$\partial_{C_i} F_k(\bar{C}, C) = \begin{cases} 0 & \text{for } i > k, \\ 1 & \text{for } i = k, \\ -1 + \frac{\pi\rho}{6M_P} \left( \delta_{k-1} \mathcal{N}'_i \mathbf{G}_{k-1,k-1}^3 + 3\delta_{k-1}^2 \mathcal{N}_{k-1} \mathcal{G}'_i \mathbf{G}_{k-1,k-1}^{2+n} + 3 \sum_{\ell=1}^{k-2} \mathcal{N}_\ell \delta_\ell \mathcal{G}'_i \delta_i \mathbf{G}_{\ell,k-1}^{2+n} \right) & \text{for } i = k-1, \\ \frac{\pi\rho}{6M_P} \mathcal{N}'_i \delta_i (\mathbf{G}_{i,k-1}^3 - \mathbf{G}_{i,k-2}^3) + 3 \frac{\pi\rho}{6M_P} \sum_{\ell=1}^i \mathcal{N}_\ell \delta_\ell \mathcal{G}'_i \delta_i (\mathbf{G}_{\ell,k-1}^{2+n} - \mathbf{G}_{\ell,k-2}^{2+n}) & \text{for } i < k-1, \end{cases} \quad (\text{S3})$$

where  $\mathcal{N}_k = \mathcal{N}(C_k)$ ,  $\mathcal{N}'_k = \mathcal{N}'(C_k)$ ,  $\mathcal{G}_k = \mathcal{G}_0(C_k)$ ,  $\mathcal{G}'_k = \mathcal{G}'_0(C_k)$  and, as already defined in (26),

$$\mathbf{G}_{\ell,k} := \left( x_n^{1-n} + (1-n) \sum_{m=\ell}^k \mathcal{G}_m \delta_m \right)^{\frac{1}{1-n}}.$$

##### S3 Objective functional

In general, by considering the  $x^m$  weighted PSD, the objective functional as stated in (1) can be written in terms of moments as follows:

$$\hat{J}(Y_m, Y_{m+1}, Y_{m+2}) = \frac{Y_{m+2}}{Y_m} - \left( \frac{Y_{m+1}}{Y_m} \right)^2. \quad (\text{S4})$$

The constraint in (1) is defined as:

$$h(C) := E[q(T, \cdot)] - \mu_d = 0. \quad (\text{S5})$$

In terms of moments, the constraint (S5) is written as:

$$h(C) = \hat{h}(Y_m, Y_{m+1}) = \frac{Y_{m+1}}{Y_m} - \mu_D. \quad (\text{S6})$$

For  $m = 0$ , the number weighted PSD, whereas for  $m = 3$ , the volume-weighted PSD is considered.

##### S4 Derivative of the objective functional

The derivative of the objective functional stated in S3 is given as follows:

$$\begin{aligned} \partial_{C_i} \hat{J}(Y_m, Y_{m+1}, Y_{m+2}) &= \frac{Y_m \partial_{C_i} Y_{m+2} - Y_{m+2} \partial_{C_i} Y_m}{Y_m^2} \\ &\quad - 2 \left( \frac{Y_{m+1}}{Y_m} \right) \frac{Y_m \partial_{C_i} Y_{m+1} - Y_{m+1} \partial_{C_i} Y_m}{Y_m^2}. \end{aligned} \quad (\text{S7})$$

In addition, the derivative of the constraint S6 is given by:

$$\partial_{C_i} \hat{h}(Y_m, Y_{m+1}) = \frac{Y_m \partial_{C_i} Y_{m+1} - Y_{m+1} \partial_{C_i} Y_m}{Y_m^2}. \quad (\text{S8})$$

<sup>\*</sup> These authors contributed equally to this manuscript.

<sup>a</sup> Friedrich-Alexander-Universität Erlangen-Nürnberg (FAU), Department of Data Science (DDS), Professorship of Optimization under Uncertainty & Data Analysis, Nürnberger Straße 74, 91052 Erlangen, Germany. E-mail: {jana.dienstbier, andrea.gilch}@fau.de

<sup>b</sup> Friedrich-Alexander Universität Erlangen-Nürnberg (FAU), Department of Mathematics, Chair of Applied Mathematics (Continuous Optimization), Cauerstraße 11, 91058 Erlangen, Germany; Competence Center Scientific Computing (FAU CSC), Martensstrasse 5a, 91058 Erlangen, Germany. E-mail: {adeel.muneer, lukas.pflug}@fau.de
